# Supplementary material
Source: PubMed Central journal article supplement (PMC10334568)
Supplement: NIHMS1886262-supplement-1.pdf [file NIHMS1886262-supplement-1.pdf]

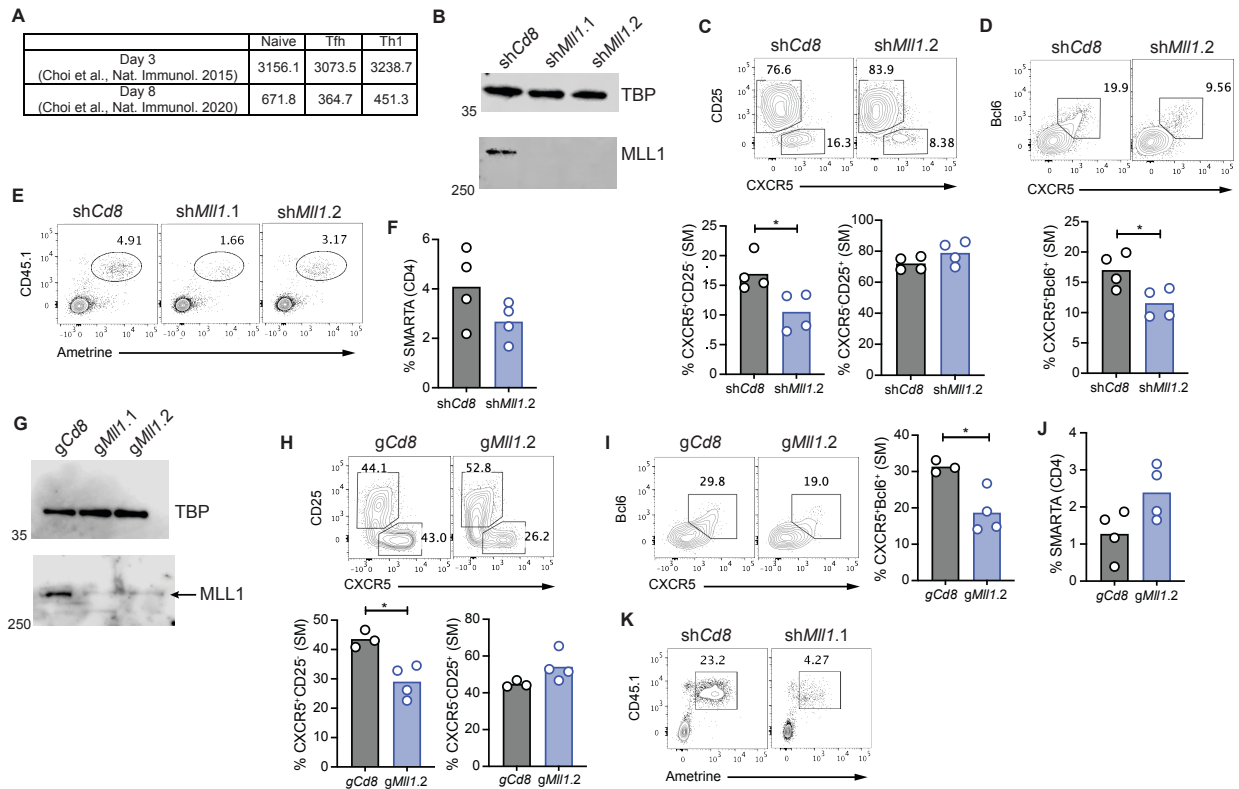

### Supplemental Figure 1: Mll1 is required for proper differentiation of early T<sub>fh</sub>.

(A) TPM values for *Mll1* and in naïve, T<sub>fh</sub> and T<sub>H1</sub> CD4 T cells. Data is from the indicated papers. (B) Expression of TBP and Mll1 in shRNA<sup>+</sup> SMARTA CD4 T cells *in vitro*. (C-F) shRNA<sup>+</sup> SMARTA CD4 T cells were transferred into C57BL/6 mice and analyzed 3 days after infection with LCMV-Arm. CXCR5<sup>+</sup>CD25<sup>-</sup> T<sub>fh</sub> and CXCR5<sup>-</sup>CD25<sup>+</sup> T<sub>H1</sub> (C) and CXCR5<sup>+</sup>Bcl6<sup>+</sup> T<sub>fh</sub> (D) in SMARTA CD4 T cells. (E, F) Flow plots and quantitation of SMARTA CD4 T cells. (G) Expression of TBP and Mll1 in gRNA<sup>+</sup> Cas9<sup>Tg</sup> SMARTA CD4 T cells *in vitro*. (H-I) gRNA<sup>+</sup> Cas9<sup>Tg</sup> SMARTA CD4 T cells were transferred into C57BL/6 mice and analyzed 3 days after infection with LCMV-Arm. CXCR5<sup>+</sup>CD25<sup>-</sup> T<sub>fh</sub> and CXCR5<sup>-</sup>CD25<sup>+</sup> T<sub>H1</sub> (H) and CXCR5<sup>+</sup>Bcl6<sup>+</sup> T<sub>fh</sub> (I) in Cas9<sup>Tg</sup> SMARTA CD4 T cells. (J) Quantitation of Cas9<sup>Tg</sup> SMARTA CD4 T cells. (K) Flow plots and quantitation of shRNA<sup>+</sup> SMARTA CD4 T cells transferred into C57BL/6 mice and analyzed 6 days after infection with LCMV-Arm. Data shown are from one experiment representative of 1 (B, G), 4 (C-F), 3 (G-I) or 5 (K) independent experiments with 3-4 mice per group. \*p ≤ 0.05 (unpaired two-tailed Student's t-test).

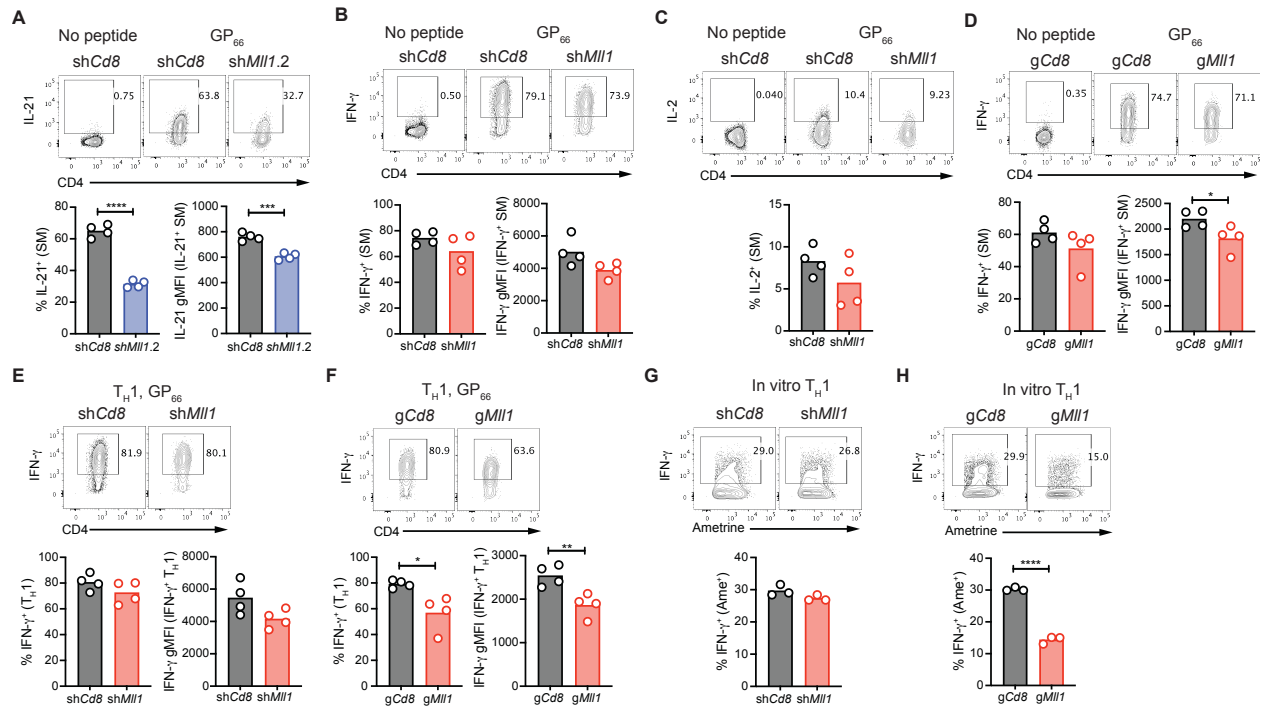

### Supplemental Figure 2: Mll1 is required for IL-21 production.

(A-C, E) shRNA<sup>+</sup> SMARTA CD4 T cells were transferred into C57BL/6 mice. 6 days after infection with LCMV-Arm, splenocytes were restimulated with LCMV gp<sub>66-77</sub> peptide. Expression of IL-21 (A), IFN- $\gamma$  (B) or IL-2 (C) in SMARTA CD4 T cells and of (E) IFN- $\gamma$  in T<sub>H</sub>1 SMARTA CD4 T cells. (D, F) gRNA<sup>+</sup> Cas9<sup>Tg</sup> SMARTA CD4 T cells were transferred into C57BL/6 mice. 6 days after infection with LCMV-Arm, splenocytes were restimulated with LCMV gp<sub>66-77</sub> peptide. Expression of (D) IL-21 in Cas9<sup>Tg</sup> SMARTA CD4 T cells and of (F) IFN- $\gamma$  in T<sub>H</sub>1 Cas9<sup>Tg</sup> SMARTA CD4 T cells. (G) Expression of IFN- $\gamma$  in shRNAmir<sup>+</sup> CD4 T cells cultured in T<sub>H</sub>1 conditions and restimulated with anti-CD3. (H) Expression of IFN- $\gamma$  in gRNA<sup>+</sup> Cas9<sup>Tg</sup> SMARTA CD4 T cells cultured in T<sub>H</sub>1 conditions and restimulated with anti-CD3. Data shown are from one experiment representative of 5 (A, B, E, F) or 2 (C, D, G-H) independent experiments with 3-4 mice per group. \*p  $\leq$  0.05, \*\*p  $\leq$  0.01, \*\*\*p  $\leq$  0.001, \*\*\*\*p  $\leq$  0.0001 (unpaired two-tailed Student's t-test).

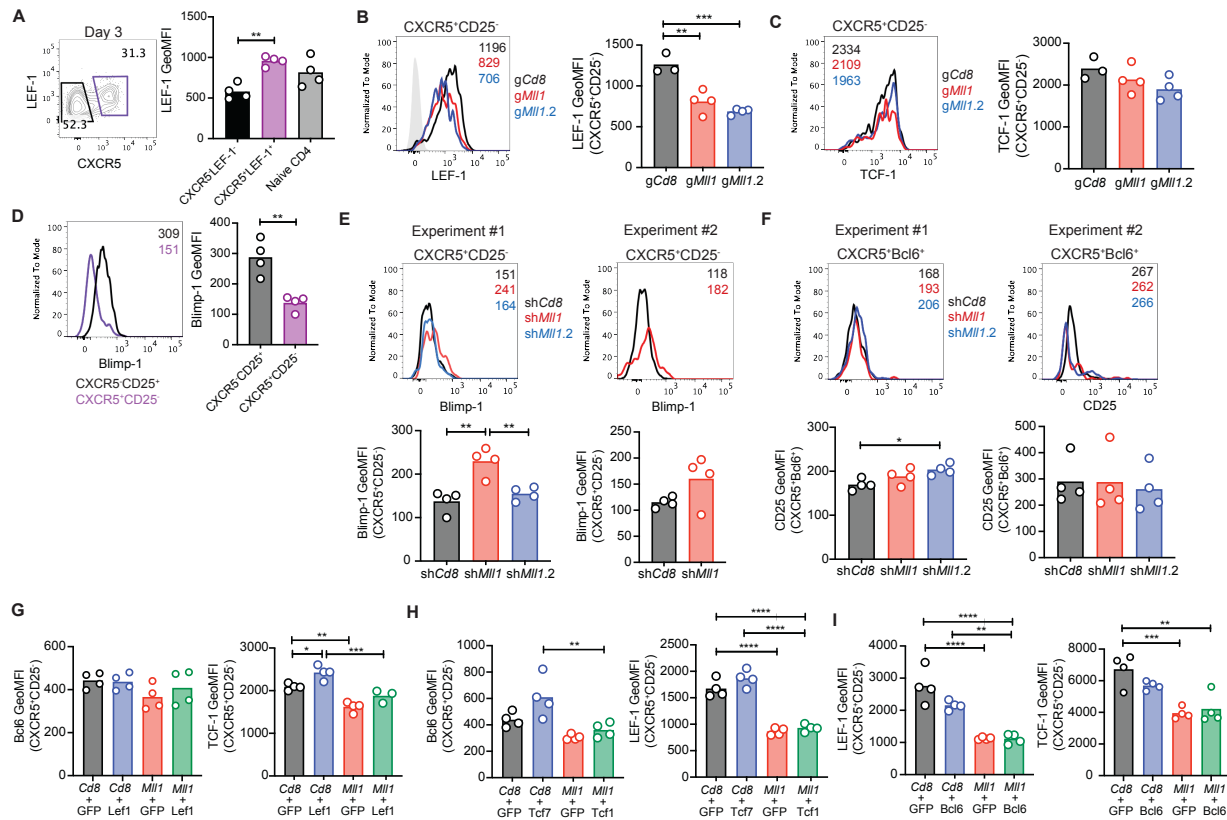

### Supplemental Figure 3: Mli1 regulates expression of LEF-1, TCF-1 in T<sub>FH</sub> cells.

shRNA<sup>+</sup> SMARTA (A, D-F), gRNA<sup>+</sup> Cas9<sup>Tg</sup> SMARTA (B, C) or shRNA<sup>+</sup>RV<sup>+</sup> SMARTA (G-I) CD4 T cells were transferred into C57BL/6 mice and analyzed 3 days after infection with LCMV-Arm. (A) Expression of CXCR5 and LEF-1 in shCd8<sup>+</sup> SMARTA CD4 T cells and quantitation of LEF-1 expression. (B-C) Histogram and quantitation of LEF-1 (B) and TCF-1 (C) expression in Cas9<sup>Tg</sup> SMARTA CXCR5<sup>+</sup>CD25<sup>-</sup> T<sub>FH</sub>. Numbers in the histograms indicate geometric MFI values. (D) Histogram and quantitation of Blimp-1 expression in CXCR5<sup>+</sup>CD25<sup>+</sup> and CXCR5<sup>+</sup>CD25<sup>-</sup> shCd8<sup>+</sup> SMARTA CD4 T cells. Numbers in the histogram indicate geometric MFI values. (E) Histogram and quantitation of Blimp-1 expression in CXCR5<sup>+</sup>CD25<sup>-</sup> SMARTA CD4 T cells for two independent experiments. Numbers in the histograms indicate geometric MFI values. (F) Histogram and quantitation of CD25 expression in CXCR5<sup>+</sup>Bcl6<sup>+</sup> SMARTA CD4 T cells for two independent experiments. Numbers in the histograms indicate geometric MFI values. (G-I). Quantitation of Bcl6, TCF-1 or LEF-1 expression in CXCR5<sup>+</sup>CD25<sup>-</sup> SMARTA CD4 T cells. Data shown are from one experiment representative of 2-3 independent experiments with 4 mice per group (A-D, G-I). (D) \*\*p ≤ 0.01 (unpaired two-tailed Student's t-test). (A, B, C, E-I) \*p ≤ 0.05, \*\*p ≤ 0.01, \*\*\*p ≤ 0.001, \*\*\*\*p ≤ 0.0001 (one way ANOVA with Tukey's multiple comparisons test).
